# Supplementary material
Source: ML conference proceedings conference paper supplement (https://proceedings.neurips.cc/paper_files/paper/2021/hash/94130ea17023c4837f0dcdda95034b65-Abstract.html)
Supplement: Supplementary file [file 94130ea17023c4837f0dcdda95034b65-Supplemental.pdf]

# Supplementary Material:

## Improving Transferability of Representations via Augmentation-Aware Self-Supervision

### A Trade-off between augmentation invariance and awareness

We first emphasize that we want  $f(\mathbf{x})$  to learn both augmentation-invariant and augmentation-aware information (or features) in the input  $\mathbf{x}$ . To this end, we train  $g$  and  $\phi$  to extract each information from  $f(\mathbf{x})$ , respectively; in other words, we want the functions  $g(f(t_1(\mathbf{x})))$  and  $\phi(f(t_1(\mathbf{x})), f(t_2(\mathbf{x})))$  to be invariant and variant with respect to the augmentation  $t_1$  (and  $t_2$ ), respectively. Here, if the shared network  $f$  has a limited capacity (e.g., few parameters or dimension), the two training objectives (for  $g$  and  $\phi$ ) may interfere with each other, i.e.,  $f(\mathbf{x})$  might become less invariant (or contain less augmentation-invariant information). However, our choice  $f$  of deep neural networks (DNNs) in our experiments does not suffer from the issue (i.e., DNNs are highly expressive), so our goal is achievable with a negligible loss of augmentation-invariant information. To support this, we compute the cosine similarity between representations from augmented and original samples, i.e.,  $\text{CS} = \mathbb{E}_{\mathbf{x} \sim \mathcal{D}, t \sim \mathcal{T}}[\text{sim}(g \circ f(t(\mathbf{x})), g \circ f(\mathbf{x}))]$ . Note that this metric becomes higher as the representation  $g(f(\mathbf{x}))$  is more invariant to the augmentation  $t \sim \mathcal{T}$ . We here use STL10-pretrained models. Table 1 shows that AugSelf does not significantly change the cosine similarity CS; in other words, AugSelf is not harmful to the augmentation-invariant objective.

Table 1: The invariance metric,  $\text{CS} = \mathbb{E}_{\mathbf{x} \sim \mathcal{D}, t \sim \mathcal{T}}[\text{sim}(g \circ f(t(\mathbf{x})), g \circ f(\mathbf{x}))]$ , with 95% confidence intervals over 80k random samples in the STL10 test split [1]. Higher values mean  $f(\mathbf{x})$  is more invariant to the augmentations  $\mathcal{T}$ .

| AugSelf (ours) | SimSiam [2]   | BYOL [3]      | SimCLR [4]    | MoCo [5]      |
|----------------|---------------|---------------|---------------|---------------|
|                | 0.9263±0.0005 | 0.9555±0.0004 | 0.9378±0.0006 | 0.9274±0.0006 |
| ✓              | 0.9250±0.0006 | 0.9453±0.0004 | 0.9385±0.0005 | 0.9280±0.0006 |

### B Hyperparameter sensitivity analysis

We simply use the same value of  $\lambda$ , e.g.,  $\lambda = 1$  for STL10 experiments, across different augmentations and different downstream tasks. One can find a better hyperparameter by tuning it on each augmentation and each downstream task, but we do not make much effort to tune it as our method is not too sensitive to hyperparameters. We here provide the sensitivity analysis to the hyperparameter  $\lambda$  with varying  $\lambda \in \{0.5, 1.0, 2.0\}$  under the STL10 pretraining setup. Table 2 shows that the overall transfer learning performance is not too sensitive to  $\lambda$  and AugSelf clearly improves the performance in all the cases over the baseline (i.e.,  $\lambda = 0$ ).

Table 2: Linear evaluation accuracy (%) of ResNet-18 [6] pretrained by SimSiam [2] and our AugSelf with varying the hyperparameter  $\lambda$ .

| Pretraining objective                                                                            | $\lambda$ | STL10 | CIFAR10 | CIFAR100 | Food  | MIT67 | Pets  | Flowers | Avg   |
|--------------------------------------------------------------------------------------------------|-----------|-------|---------|----------|-------|-------|-------|---------|-------|
| $\mathcal{L}_{\text{SimSiam}}$                                                                   | 0.0       | 85.19 | 82.35   | 54.90    | 33.99 | 39.15 | 44.90 | 59.19   | 57.09 |
| $\mathcal{L}_{\text{SimSiam}} + \lambda \mathcal{L}_{\text{crop}}$                               | 0.5       | 85.50 | 82.81   | 55.50    | 35.19 | 42.79 | 45.94 | 61.24   | 58.42 |
|                                                                                                  | 1.0       | 85.98 | 82.82   | 55.78    | 35.68 | 43.21 | 47.10 | 62.05   | 58.95 |
|                                                                                                  | 2.0       | 86.36 | 82.41   | 55.29    | 36.18 | 41.91 | 47.43 | 62.28   | 58.84 |
| $\mathcal{L}_{\text{SimSiam}} + \lambda \mathcal{L}_{\text{color}}$                              | 0.5       | 85.66 | 83.75   | 58.58    | 39.39 | 42.61 | 47.15 | 70.05   | 61.03 |
|                                                                                                  | 1.0       | 85.55 | 82.90   | 58.11    | 40.32 | 43.56 | 47.85 | 71.08   | 61.34 |
|                                                                                                  | 2.0       | 84.79 | 82.56   | 58.89    | 40.69 | 43.41 | 46.79 | 71.93   | 61.29 |
| $\mathcal{L}_{\text{SimSiam}} + \lambda(\mathcal{L}_{\text{crop}} + \mathcal{L}_{\text{color}})$ | 0.5       | 86.07 | 82.67   | 57.72    | 39.92 | 43.88 | 48.86 | 70.93   | 61.43 |
|                                                                                                  | 1.0       | 85.70 | 82.76   | 58.65    | 41.58 | 45.67 | 48.42 | 72.18   | 62.14 |
|                                                                                                  | 2.0       | 84.56 | 83.08   | 59.49    | 41.72 | 44.50 | 49.04 | 72.35   | 62.11 |

## C Fine-tuning experiments

We fine-tune ImageNet100-pretrained models using a fine-tuning strategy, L2SP [7].<sup>1</sup> Following Xuhong et al. [7], we use the same set of hyperparameters, i.e.,  $\beta = 0.01$ ,  $\alpha \in \{0.001, 0.01, 0.1, 1\}$ , and  $lr \in \{0.005, 0.01, 0.02\}$ . We evaluate the fine-tuning accuracy on five benchmarks, MIT67 [8], CUB200 [9], Food [10], Stanford Dogs [11], and Caltech256 [12]. Table 3 shows the effectiveness of our AugSelf in the fine-tuning scenarios.

Table 3: Fine-tuning accuracy (%) averaged over 5 trials with 95% confidence intervals.

| Method           | MIT67                            | CUB200                           | Food                             | Stanford Dogs                    | Caltech256                       |
|------------------|----------------------------------|----------------------------------|----------------------------------|----------------------------------|----------------------------------|
| SimSiam          | 67.69 $\pm$ 0.48                 | 67.59 $\pm$ 0.41                 | 66.66 $\pm$ 0.36                 | 69.34 $\pm$ 0.29                 | 52.37 $\pm$ 0.45                 |
| + AugSelf (ours) | <b>69.31<math>\pm</math>0.56</b> | <b>70.22<math>\pm</math>0.66</b> | <b>70.19<math>\pm</math>0.18</b> | <b>70.26<math>\pm</math>0.20</b> | <b>54.66<math>\pm</math>0.07</b> |

## D Robustness under perturbations

We also evaluate the robustness of the learned representations by our method. To this end, we use two types of robustness metrics: (1) adversarial robustness using the single-step fast gradient sign method (FGSM) [13] and (2) robustness to common corruptions, especially weather (fog, frost, and snow) corruptions, proposed by [14]. We here use supervised models trained on ImageNet100 for generating adversarial samples. Table 4 shows the classification accuracy on ImageNet100 under the two types of perturbations.

Table 4: Classification accuracy (%) under various perturbations.

| Method           | Clean | FGSM               |                    |                    | Weather corruption |       |       |
|------------------|-------|--------------------|--------------------|--------------------|--------------------|-------|-------|
|                  |       | $\epsilon = 1/255$ | $\epsilon = 2/255$ | $\epsilon = 4/255$ | Fog                | Frost | Snow  |
| SimSiam          | 85.60 | 32.48              | 22.80              | 17.70              | 57.53              | 53.96 | 43.85 |
| + AugSelf (ours) | 85.40 | 32.90              | 21.60              | 16.64              | 57.42              | 53.97 | 45.65 |

We observe that our AugSelf does not significantly affect the robustness of learned representations. This result is somewhat interesting because the representations learned with AugSelf are more sensitive to diverse information than those without AugSelf. Since improving the adversarial robustness of self-supervised learning is an ongoing topic [15, 16], we believe that incorporating the idea with our framework would be an interesting research direction.

## E Datasets

Table 5 summarizes detailed descriptions of (a) pretraining datasets, (c) linear evaluation benchmarks, and (c) few-shot learning benchmarks. For linear evaluation benchmarks, we randomly choose validation samples in the training split for each dataset when the validation split is not officially provided. For few-shot benchmarks, we use the meta-test split for FC100 [17], and whole datasets for CUB200 [9] and Plant Disease [18]. The evaluation details are described in Section G.

## F Pretraining setup

### F.1 ImageNet100 pretraining

We pretrain the standard ResNet-50 [6] architecture in the ImageNet100<sup>2</sup> [19, 20] dataset for 500 training epochs using SimSiam [2] and MoCo [5] methods. We use a batch size of 256 and a cosine learning rate schedule without restarts [29]. Note that the pretraining setups are the same as they officially used for ImageNet pretraining described in [2, 5, 30]. In multi-GPU experiments, we use

<sup>1</sup>L2SP [7] use  $\Omega(\theta) = \frac{\alpha}{2} \|\theta - \theta^0\|_2^2 + \frac{\beta}{2} \|\theta_{cls}\|_2^2$  as the regularization term where  $\theta^0$  is the vector of pretrained parameters (i.e., an initial point) and  $\theta_{cls}$  is the vector of classifier parameters.

<sup>2</sup>ImageNet100 is a 100-category subset of ImageNet [19]. We use the same split following Tian et al. [20].

Table 5: Dataset information.

| Category              | Dataset               | # of classes | Training | Validation | Test  | Metric                  |
|-----------------------|-----------------------|--------------|----------|------------|-------|-------------------------|
| (a) Pretraining       | STL10 [1]             | 10           | 105000   | -          | -     | -                       |
|                       | ImageNet100 [19, 20]  | 1000         | 126689   | -          | -     | -                       |
| (b) Linear evaluation | STL10 [1]             | 10           | 4500     | 500        | 8000  | Top-1 accuracy          |
|                       | CIFAR10 [21]          | 10           | 45000    | 5000       | 10000 | Top-1 accuracy          |
|                       | CIFAR100 [21]         | 100          | 45000    | 5000       | 10000 | Top-1 accuracy          |
|                       | Food [10]             | 101          | 68175    | 7575       | 25250 | Top-1 accuracy          |
|                       | MIT67 [8]             | 67           | 4690     | 670        | 1340  | Top-1 accuracy          |
|                       | Pets [22]             | 37           | 2940     | 740        | 3669  | Mean per-class accuracy |
|                       | Flowers [23]          | 102          | 1020     | 1020       | 6149  | Mean per-class accuracy |
|                       | Caltech101 [24]       | 101          | 2525     | 505        | 5647  | Mean Per-class accuracy |
|                       | Cars [25]             | 196          | 6494     | 1650       | 8041  | Top-1 accuracy          |
|                       | Aircraft [26]         | 100          | 3334     | 3333       | 3333  | Mean Per-class accuracy |
| (c) Few-shot          | DTD (split 1) [27]    | 47           | 1880     | 1880       | 1880  | Top-1 accuracy          |
|                       | SUN397 (split 1) [28] | 397          | 15880    | 3970       | 19850 | Top-1 accuracy          |
|                       | FC100 [17]            | 20           | -        | -          | 12000 | Average accuracy        |
|                       | CUB200 [9]            | 200          | -        | -          | 11780 | Average accuracy        |
|                       | Plant Disease [18]    | 38           | -        | -          | 54305 | Average accuracy        |

the synchronized batch normalization following Chen and He [2]. When incorporating our AugSelf into the methods, we use  $\lambda = 0.5$  and  $\mathcal{A}_{\text{AugSelf}} = \{\text{crop}, \text{color}\}$ . Note that SimSiam [2] and MoCo [5] requires 32 and 29 hours on a single RTX3090 4-GPU machine, respectively.

**SimSiam** [2]. We use a learning rate 0.05 and a weight decay of 0.0001. We use a 3-layer projection MLP head  $g(\cdot)$  with a hidden dimension of 2048 and an output dimension of 2048. We use a batch normalization [31] at the last layer in the projection MLP. We use a 2-layer prediction MLP head  $h(\cdot)$  with a hidden dimension of 512 and no batch normalization at the last layer in the prediction MLP. When optimizing the prediction MLP, we use a constant learning rate schedule following Chen and He [2].

**MoCo** [5]. We use a learning rate 0.03 and a weight decay of 0.0001. Following an advanced version of MoCo [30, MoCo v2], we use a 2-layer projection MLP head  $g(\cdot)$  with a hidden dimension of 2048 and an output dimension of 128. We use a batch normalization [31] at only the hidden layer. We also use a temperature scaling parameter of 0.2, an exponential moving average parameter of 0.999, and a queue size of 65536.

## F.2 STL10 pretraining

We pretrain the standard ResNet-18 [6] architecture in the STL10 [1] dataset. For all methods, we use the same optimization scheme: stochastic gradient descent (SGD) with a learning rate of 0.03, a batch size of 256, a weight decay of 0.0005, a momentum of 0.9. The learning rate follows a cosine decay schedule without restarts [29]. When incorporating our AugSelf into the methods, we use  $\lambda = 1.0$  and  $\mathcal{A}_{\text{AugSelf}} = \{\text{crop}, \text{color}\}$ , unless otherwise stated. We now describe method-specific hyperparameters one by one in the following.

**SimCLR** [4]. We use a 2-layer projection MLP head  $g(\cdot)$  with a hidden dimension of 512 and an output dimension of 128. We do not use a batch normalization [31] at the last layer in the MLP. We use a temperature scaling parameter of 0.2 in contrastive learning.

**MoCo** [5]. We use an advanced version of MoCo [30, MoCo v2] with the same projection MLP architecture as SimCLR used. Other hyperparameters are the same as the ImageNet100 setup described in Section F.1.

**BYOL** [3]. Following Grill et al. [3], we use a 2-layer projection MLP head  $g(\cdot)$  with a hidden dimension of 4096 and an output dimension of 256. We do not use a batch normalization [31] at the last layer in the MLP. We use the same architecture for the prediction MLP head  $h(\cdot)$ . The exponential moving average parameter is increased starting from 0.996 to 1.0 with a cosine schedule following Grill et al. [3].

**SimSiam** [2]. We use a 2-layer projection MLP with a hidden dimension of 2048 and an output dimension of 2048. Other hyperparameters are the same as the ImageNet100 setup described in Section F.1.

**SwAV** [32]. We use a 2-layer projection MLP head  $g(\cdot)$  with a hidden dimension of 2048 and an output dimension of 128 without batch normalization [31] at the last layer in the MLP. We use 100 prototypes, a smoothness factor of  $\epsilon = 0.05$  and a temperature scaling parameter of  $\tau = 0.1$ . We do not use the multi-resolution cropping technique and the additional queue storing previous batches for simplicity.

### F.3 Augmentations

In this section, we describe augmentations using PyTorch [33] notations in the following. Note that we use random cropping, flipping, color jittering, grayscale, and Gaussian blurring unless otherwise stated.

- **RandomResizedCrop**. The scale of cropping is randomly sampled from  $[0.2, 1.0]$ . The cropped images are resized to  $96 \times 96$  and  $224 \times 224$  for STL10 [1] and ImageNet [19] pretraining, respectively.
- **RandomHorizontalFlip**. This operation is randomly applied with a probability of 0.5.
- **ColorJitter**. The maximum strengths of brightness, contrast, saturation and hue factors are 0.4, 0.4, 0.4 and 0.1, respectively. This operation is randomly applied with a probability of 0.8. In Section 2, we adjust the strengths by multiplying a strength factor  $s$ , i.e.,  $s > 1$  means stronger color jittering than the default configuration while  $s < 1$  means weaker color jittering.
- **RandomGrayscale**. This operation is randomly applied with a probability of 0.2.
- **GaussianBlur**. The standard deviation is randomly sampled from  $[0.1, 2.0]$ . The kernel size is  $9 \times 9$  and  $23 \times 23$  for STL10 [1] and ImageNet [19] pretraining, respectively. This operation is randomly applied with a probability of 0.5.
- **Rotation**. This rotates an image by  $0^\circ, 90^\circ, 180^\circ, 270^\circ$  randomly. This operation is randomly applied with a probability of 0.5 after the default geometric augmentations are applied.
- **Solarization**. This inverts each pixel value when the value is larger than a randomly sampled threshold. Formally, for an uniformly sampled threshold  $\delta \sim U(0, 1)$ ,

$$x_{\text{new}}^{(i,j)} \leftarrow \mathbb{1}[x_{\text{old}}^{(i,j)} < \delta]x_{\text{old}}^{(i,j)} + \mathbb{1}[x_{\text{old}}^{(i,j)} \geq \delta](1 - x_{\text{old}}^{(i,j)}),$$

for all pixels  $(i, j)$ . This operation is randomly applied with a probability of 0.5 right after **ColorJitter** is applied.

## G Evaluation protocol

**Linear evaluation benchmarks.** We follow the same linear transfer evaluation protocol [4, 3, 34]; we train linear classifiers upon the frozen features extracted from  $224 \times 224$  (or  $96 \times 96$  for STL10 pretraining) center-cropped images without data augmentation. To be specific, images are first resized to 224 pixels along the shorter side, and then cropped by  $224 \times 224$  at the center of the images. Then, we minimize the  $\ell_2$ -regularized cross-entropy objective using L-BFGS. The regularization parameter is selected from a range of 45 logarithmically spaced values from  $10^{-6}$  to  $10^5$  using the validation split. After selecting the best hyperparameter, we train again the linear classifier using both training and validation splits and then report the test accuracy using the model. Note that we set the maximum number of iterations in L-BFGS as 5000 and use the previous solution as an initial point (i.e., warm start) for the next step.

**Few-shot benchmarks.** For evaluating representations in few-shot benchmarks, we simply perform logistic regression<sup>3</sup> using the frozen representations  $f(\mathbf{x})$  and  $N \times K$  support samples without fine-tuning and data augmentation in a  $N$ -way  $K$ -shot episode.

**Object localization.** For predicting bounding box information (i.e., top left coordinates and sizes of bounding boxes), we simply perform linear regression<sup>3</sup> using the frozen representations  $f(\mathbf{x})$  and all training samples in CUB200 [9] without fine-tuning and data augmentation.

---

<sup>3</sup>We use the scikit-learn **LogisticRegression** and **LinearRegression** modules for logistic regression and linear regression, respectively.

## Checklist

1. For all authors...
  - (a) Do the main claims made in the abstract and introduction accurately reflect the paper's contributions and scope? [Yes]
  - (b) Did you describe the limitations of your work? [Yes]
  - (c) Did you discuss any potential negative societal impacts of your work? [Yes]
  - (d) Have you read the ethics review guidelines and ensured that your paper conforms to them? [Yes]
2. If you are including theoretical results...
  - (a) Did you state the full set of assumptions of all theoretical results? [N/A]
  - (b) Did you include complete proofs of all theoretical results? [N/A]
3. If you ran experiments...
  - (a) Did you include the code, data, and instructions needed to reproduce the main experimental results (either in the supplemental material or as a URL)? [Yes] See <https://github.com/hankook/AugSelf>.
  - (b) Did you specify all the training details (e.g., data splits, hyperparameters, how they were chosen)? [Yes] See Section E, Section F, and Section G.
  - (c) Did you report error bars (e.g., with respect to the random seed after running experiments multiple times)? [Yes]
  - (d) Did you include the total amount of compute and the type of resources used (e.g., type of GPUs, internal cluster, or cloud provider)? [Yes] See Section F.I.
4. If you are using existing assets (e.g., code, data, models) or curating/releasing new assets...
  - (a) If your work uses existing assets, did you cite the creators? [Yes] See Section E.
  - (b) Did you mention the license of the assets? [N/A]
  - (c) Did you include any new assets either in the supplemental material or as a URL? [N/A]
  - (d) Did you discuss whether and how consent was obtained from people whose data you're using/curating? [N/A]
  - (e) Did you discuss whether the data you are using/curating contains personally identifiable information or offensive content? [N/A]
5. If you used crowdsourcing or conducted research with human subjects...
  - (a) Did you include the full text of instructions given to participants and screenshots, if applicable? [N/A]
  - (b) Did you describe any potential participant risks, with links to Institutional Review Board (IRB) approvals, if applicable? [N/A]
  - (c) Did you include the estimated hourly wage paid to participants and the total amount spent on participant compensation? [N/A]

## References

- [1] Adam Coates, Andrew Ng, and Honglak Lee. An analysis of single-layer networks in unsupervised feature learning. In *Proceedings of the International Conference on Artificial Intelligence and Statistics*, pages 215–223. JMLR Workshop and Conference Proceedings, 2011.
- [2] Xinlei Chen and Kaiming He. Exploring simple siamese representation learning. *arXiv preprint arXiv:2011.10566*, 2020.
- [3] Jean-Bastien Grill, Florian Strub, Florent Alché, Corentin Tallec, Pierre H Richemond, Elena Buchatskaya, Carl Doersch, Bernardo Avila Pires, Zhaohan Daniel Guo, Mohammad Gheshlaghi Azar, et al. Bootstrap Your Own Latent: A new approach to self-supervised learning. *arXiv preprint arXiv:2006.07733*, 2020.
- [4] Ting Chen, Simon Kornblith, Mohammad Norouzi, and Geoffrey Hinton. A simple framework for contrastive learning of visual representations. In *Proceedings of International Conference on Machine Learning*, pages 1597–1607. PMLR, 2020.
- [5] Kaiming He, Haoqi Fan, Yuxin Wu, Saining Xie, and Ross Girshick. Momentum contrast for unsupervised visual representation learning. In *Proceedings of the IEEE/CVF Conference on Computer Vision and Pattern Recognition*, pages 9729–9738, 2020.
- [6] Kaiming He, Xiangyu Zhang, Shaoqing Ren, and Jian Sun. Deep residual learning for image recognition. In *Proceedings of the IEEE Conference on Computer Vision and Pattern Recognition*, pages 770–778, 2016.
- [7] LI Xuhong, Yves Grandvalet, and Franck Davoine. Explicit inductive bias for transfer learning with convolutional networks. In *International Conference on Machine Learning*, pages 2825–2834. PMLR, 2018.
- [8] Ariadna Quattoni and Antonio Torralba. Recognizing indoor scenes. In *Proceedings of the IEEE Conference on Computer Vision and Pattern Recognition*, pages 413–420. IEEE, 2009.
- [9] C. Wah, S. Branson, P. Welinder, P. Perona, and S. Belongie. The Caltech-UCSD Birds-200-2011 Dataset. Technical Report CNS-TR-2011-001, California Institute of Technology, 2011.
- [10] Lukas Bossard, Matthieu Guillaumin, and Luc Van Gool. Food-101 – mining discriminative components with random forests. In *Proceedings of the European Conference on Computer Vision*, 2014.
- [11] Aditya Khosla, Nityananda Jayadevaprakash, Bangpeng Yao, and Li Fei-Fei. Novel dataset for fine-grained image categorization. In *First Workshop on Fine-Grained Visual Categorization, IEEE Conference on Computer Vision and Pattern Recognition*, Colorado Springs, CO, June 2011.
- [12] Gregory Griffin, Alex Holub, and Pietro Perona. Caltech-256 object category dataset. 2007.
- [13] Ian J Goodfellow, Jonathon Shlens, and Christian Szegedy. Explaining and harnessing adversarial examples. In *International Conference on Learning Representations*, 2015.
- [14] Dan Hendrycks and Thomas Dietterich. Benchmarking neural network robustness to common corruptions and perturbations. In *International Conference on Learning Representations*, 2019.
- [15] Minseon Kim, Jihoon Tack, and Sung Ju Hwang. Adversarial self-supervised contrastive learning. In *Advances in Neural Information Processing Systems*, 2020.
- [16] Chih-Hui Ho and Nuno Vasconcelos. Contrastive learning with adversarial examples. In *Advances in Neural Information Processing Systems*, 2020.
- [17] Boris Oreshkin, Pau Rodríguez López, and Alexandre Lacoste. Tadam: Task dependent adaptive metric for improved few-shot learning. In *Advances in Neural Information Processing Systems*, pages 721–731, 2018.
- [18] Sharada P Mohanty, David P Hughes, and Marcel Salathé. Using deep learning for image-based plant disease detection. *Frontiers in plant science*, 7:1419, 2016.

- [19] Olga Russakovsky, Jia Deng, Hao Su, Jonathan Krause, Sanjeev Satheesh, Sean Ma, Zhiheng Huang, Andrej Karpathy, Aditya Khosla, Michael Bernstein, et al. Imagenet large scale visual recognition challenge. *International Journal of Computer Vision*, 115(3):211–252, 2015.
- [20] Yonglong Tian, Dilip Krishnan, and Phillip Isola. Contrastive multiview coding. *arXiv preprint arXiv:1906.05849*, 2019.
- [21] Alex Krizhevsky, Geoffrey Hinton, et al. Learning multiple layers of features from tiny images. Technical report, University of Toronto, 2009.
- [22] Omkar M Parkhi, Andrea Vedaldi, Andrew Zisserman, and CV Jawahar. Cats and dogs. In *Proceedings of the IEEE Conference on Computer Vision and Pattern Recognition*, pages 3498–3505. IEEE, 2012.
- [23] Maria-Elena Nilsback and Andrew Zisserman. Automated flower classification over a large number of classes. In *Proceedings of the Indian Conference on Computer Vision, Graphics and Image Processing*, pages 722–729. IEEE, 2008.
- [24] Li Fei-Fei, Rob Fergus, and Pietro Perona. Learning generative visual models from few training examples: An incremental bayesian approach tested on 101 object categories. In *Conference on Computer Vision and Pattern Recognition Workshop*, pages 178–178. IEEE, 2004.
- [25] Jonathan Krause, Michael Stark, Jia Deng, and Li Fei-Fei. 3d object representations for fine-grained categorization. In *4th International IEEE Workshop on 3D Representation and Recognition (3dRR-13)*, Sydney, Australia, 2013.
- [26] Subhransu Maji, Esa Rahtu, Juho Kannala, Matthew Blaschko, and Andrea Vedaldi. Fine-grained visual classification of aircraft. *arXiv preprint arXiv:1306.5151*, 2013.
- [27] Mircea Cimpoi, Subhransu Maji, Iasonas Kokkinos, Sammy Mohamed, and Andrea Vedaldi. Describing textures in the wild. In *Proceedings of the IEEE Conference on Computer Vision and Pattern Recognition*, pages 3606–3613, 2014.
- [28] Jianxiong Xiao, James Hays, Krista A Ehinger, Aude Oliva, and Antonio Torralba. SUN database: Large-scale scene recognition from abbey to zoo. In *IEEE Computer Society Conference on Computer Vision and Pattern Recognition*, pages 3485–3492. IEEE, 2010.
- [29] Ilya Loshchilov and Frank Hutter. SGDR: Stochastic gradient descent with warm restarts. In *International Conference on Learning Representations*, 2017.
- [30] Xinlei Chen, Haoqi Fan, Ross Girshick, and Kaiming He. Improved baselines with momentum contrastive learning. *arXiv preprint arXiv:2003.04297*, 2020.
- [31] Sergey Ioffe and Christian Szegedy. Batch normalization: Accelerating deep network training by reducing internal covariate shift. In *Proceedings of International Conference on Machine Learning*, pages 448–456. PMLR, 2015.
- [32] Mathilde Caron, Ishan Misra, Julien Mairal, Priya Goyal, Piotr Bojanowski, and Armand Joulin. Unsupervised learning of visual features by contrasting cluster assignments. In *Advances in Neural Information Processing Systems*, 2020.
- [33] Adam Paszke, Sam Gross, Francisco Massa, Adam Lerer, James Bradbury, Gregory Chanan, Trevor Killeen, Zeming Lin, Natalia Gimelshein, Luca Antiga, Alban Desmaison, Andreas Kopf, Edward Yang, Zachary DeVito, Martin Raison, Alykhan Tejani, Sasank Chilamkurthy, Benoit Steiner, Lu Fang, Junjie Bai, and Soumith Chintala. PyTorch: An imperative style, high-performance deep learning library. In *Advances in Neural Information Processing Systems*, pages 8026–8037, 2019.
- [34] Simon Kornblith, Jonathon Shlens, and Quoc V Le. Do better imagenet models transfer better? In *Proceedings of the IEEE/CVF Conference on Computer Vision and Pattern Recognition*, pages 2661–2671, 2019.
